# Supplementary material for: Mapping and characterization of wheat stem rust resistance genes SrTm5 and Sr60 from Triticum monococcum
Source: PubMed Central journal article supplement (PMC5814525; doi:10.1007/s00122-017-3024-z), 2017-11-21
Supplement: 122_2017_3024_MOESM1_ESM.pdf [file 122_2017_3024_MOESM1_ESM.pdf]

**Table S1.** Sources, primer sequences, restriction enzymes, annealing temperatures and expected product sizes of the markers in the *Sr60* maps.

| Marker                                      | Source<br>gene      | Maker<br>type     | Forward<br>primer (5'-3')  | Reverse<br>primer (5'-3') | Rest.<br>Enz.  | Ann.<br>T(°C) | Size(bp)<br>Sus. |
|---------------------------------------------|---------------------|-------------------|----------------------------|---------------------------|----------------|---------------|------------------|
| Markers in PI 306540 × G3116 population     |                     |                   |                            |                           |                |               |                  |
| <i>puroindoline-b</i> (Grain softness)      | AJ242715            | CAPS <sup>a</sup> | CCTGATAAACCCAAACGGA        | TAGAATCGCAGCGACACTGT      | <i>Bam</i> HI  | 53            | 761              |
| <i>CJ660676</i> ( <i>IWB48091</i> )         | <i>Bradi4g00430</i> | CAPS              | TGAGGCTTGACATCGACAGT       | CAAAGCTGCATCTCCAAGGG      | <i>Acc</i> I   | 55            | 680              |
| <i>CJ899131</i>                             | <i>Bradi4g00460</i> | CAPS              | ACGACCACGAGGAGGTTACT       | CGATGTGCTTGCCATTCTT       | <i>Sal</i> I   | 53            | 867              |
| <i>CA731405</i>                             | <i>Bradi4g00480</i> | CAPS              | CGAGAACTTCCCCGACCGC        | TCAGGAACCCAGCAACAGTAACG   | <i>Sty</i> I   | 56            | 1042             |
| <i>DK722976</i>                             | <i>Bradi4g00500</i> | CAPS              | ACCGAAGACGATGGAAGAG        | TGGATCAATACCCAGAGAG       | <i>Hha</i> I   | 53            | 513              |
| <i>CA501332</i>                             | <i>Bradi4g00520</i> | CAPS              | GTGGACTTCGGTGGCTTGC        | CGTCAGACATAAATGGAACAGAGGA | <i>Ava</i> II  | 56            | 450              |
| <i>GH724575</i>                             | <i>Bradi4g00530</i> | CAPS              | AGAAGAAGGACACCAGGAT        | AACACCGTTAGTTTTTTGAA      | <i>Bsa</i> AI  | 53            | 416              |
| <i>CF133295</i> ( <i>LRRK123.1</i> )        | <i>Bradi4g00550</i> | CAPS              | TCGGCGACCTCACTCACCT        | AGTTTGCTTGTCATTTTCTCAT    | <i>Ple</i> I   | 55            | 916              |
| <i>CJ942731</i>                             | <i>Bradi4g00640</i> | dCAPS             | AGAGTAAAGTCATAACTAGGCCTGCA | ACCGACGATGCTAAAAGTCTAACA  | <i>Pst</i> I   | 57            | 170              |
| <i>CJ884584</i>                             | <i>Bradi4g00660</i> | CAPS              | ATGTGGCATTACTATCGC         | CCCTGTTACCCTCACTCA        | <i>Nci</i> I   | 52            | 753              |
| <i>FD47316</i> ( <i>IWB40642</i> )          | <i>Bradi2g27230</i> | CAPS              | TTCATTGCTGGCACCCTTG        | ACTTTGCACGTCCTCCCTTTC     | <i>Sap</i> I   | 55            | 1383             |
| <i>CJ559150</i>                             | <i>Bradi4g00800</i> | CAPS              | GCGGGAATGGACATAAGGAC       | AGCACCAGCAATACGGAA        | <i>Aci</i> I   | 52            | 1160             |
| <i>CJ671260</i>                             | <i>Bradi4g00910</i> | CAPS              | CAAATGCGATTGTGAATGTGA      | GGTAAACGAGCAGGGAGGAT      | <i>Spe</i> I   | 52            | 492              |
| <i>CJ889659</i>                             | <i>Bradi4g01250</i> | CAPS              | TTATTCTGCGTATTTGGTGG       | ACCGTATATCTCGTTTGCCT      | <i>Tsp45</i> I | 55            | 525              |
| <i>gwm154</i>                               |                     | SSR               | TCACAGAGAGAGAGGGAGGG       | ATGTGTACATGTTGCCTGCA      |                | 55            |                  |
| <i>gwm415</i>                               |                     | SSR               | GATCTCCCATGTCCGCC          | CGACAGTCGTCACCTGCCTA      |                | 55            |                  |
| <i>gwm156</i>                               |                     | SSR               | CCAACCGTGTATTAGTCATTC      | CAATGCAGGCCCTCCTAAC       |                | 60            |                  |
| <i>gwm186</i>                               |                     | SSR               | GCAGAGCCTGGTTCAAAAAG       | CGCCTCTAGCGAGAGCTATG      |                | 60            |                  |
| Markers in PI 306540 × PI 272557 population |                     |                   |                            |                           |                |               |                  |
| <i>DK722976</i>                             | <i>Bradi4g00500</i> | CAPS              | ACCGAAGACGATGGAAGAG        | TGGATCAATACCCAGAGAG       | <i>Hha</i> I   | 53            | 513              |
| <i>CA501332</i>                             | <i>Bradi4g00520</i> | CAPS              | GTGGACTTCGGTGGCTTGC        | CGTCAGACATAAATGGAACAGAGGA | <i>Bsi</i> EI  | 56            | 450              |
| <i>GH724575</i>                             | <i>Bradi4g00530</i> | CAPS              | AGAAGAAGGACACCAGGAT        | AACACCGTTAGTTTTTTGAA      | <i>Bsa</i> AI  | 53            | 416              |
| <i>CF133295</i> ( <i>LRRK123.1</i> )        | <i>Bradi4g00550</i> | CAPS              | TCGGCGACCTCACTCACCT        | AGTTTGCTTGTCATTTTCTCAT    | <i>Ple</i> I   | 55            | 916              |
| <i>CJ942731</i>                             | <i>Bradi4g00640</i> | dCAPS             | AGAGTAAAGTCATAACTAGGCCTGCA | ACCGACGATGCTAAAAGTCTAACA  | <i>Pst</i> I   | 57            | 170              |
| <i>FD47316</i> ( <i>IWB40642</i> )          | <i>Bradi2g27230</i> | CAPS              | TTCATTGCTGGCACCCTTG        | ACTTTGCACGTCCTCCCTTTC     | <i>Sap</i> I   | 55            | 1383             |

<sup>a</sup> Cleaved amplified polymorphic sequence. <sup>b</sup> Derived cleaved amplified polymorphic sequence.

**Table S2.** Candidate genes of *Sr60* within the colinear regions in *B. distahyon* and the Chinese Spring wheat reference genome.

| <i>Brachypodium</i> <sup>a</sup> | Annotation (putative function)     | Wheat marker                | Wheat gene <sup>b</sup>   |
|----------------------------------|------------------------------------|-----------------------------|---------------------------|
| <i>Bradi4g00530</i>              | Nitrate transporter (NRT1)         | <i>GH724575</i>             | <i>TraesCS5A01G004400</i> |
| <i>Bradi4g00540</i>              | Cytochrome P450/oxidoreductase     |                             |                           |
| <i>Bradi4g00550</i>              | Leucine-rich repeat protein kinase | <i>CF133295 (LRRK123.1)</i> | <i>TraesCS5A01G005300</i> |
| <i>Bradi4g00560</i>              | Hemiassterlin resistant protein    |                             |                           |
| <i>Bradi4g00565</i>              | NO                                 |                             |                           |
| <i>Bradi4g00570</i>              | Domain of unknown function         |                             |                           |
| <i>Bradi4g00580</i>              | Calcineurin-like phosphoesterase   |                             |                           |
| <i>Bradi4g00590</i>              | Calcineurin-like phosphoesterase   |                             |                           |
| <i>Bradi4g00600</i>              | NBS-LRR protein                    |                             |                           |
| <i>Bradi4g00610</i>              | NBS-LRR protein                    |                             |                           |
| <i>Bradi4g00620</i>              | NBS-LRR protein                    |                             |                           |
| <i>Bradi4g00630</i>              | NO                                 |                             |                           |
| <i>Bradi4g00640</i>              | Nitric-oxide synthase (NADPH)      | <i>CJ942731</i>             | <i>TraesCS5A01G006100</i> |

<sup>a</sup> *Brachypodium* genome: <https://phytozome.jgi.doe.gov/pz/portal.html>;

<sup>b</sup> Wheat reference genome of Chinese Spring: <https://wheat-urgi.versailles.inra.fr/Seq-Repository/BLAST>.

**Table S3.** Polymorphisms between *SrTm5* (PI 306540) and six previously reported resistant haplotypes of *Sr22*. We showed unique amino acid in *SrTm5* that are polymorphic relative to the other six resistant haplotypes of *Sr22*.

| Position <sup>a</sup><br>(protein level) | <i>Sr22</i> <sup>b</sup><br>(6 R haplotypes) | <i>SrTm5</i><br>(PI306540) | Protein<br>change |
|------------------------------------------|----------------------------------------------|----------------------------|-------------------|
| 556                                      | T                                            | S                          | T556S             |
| 580                                      | D                                            | G                          | D580G             |
| 723                                      | L                                            | R                          | L723R             |
| 728                                      | D                                            | H                          | D728H             |
| 751                                      | F                                            | C                          | F751C             |
| 774                                      | L                                            | F                          | L774F             |
| 776                                      | D                                            | N                          | D776N             |
| 777                                      | D/N/Y                                        | Q                          | D/N/Y777Q         |
| 798                                      | T                                            | S                          | T798S             |
| 800                                      | P/Y                                          | S                          | P/Y800S           |
| 822                                      | K/R                                          | S                          | K/R822S           |
| 824                                      | E                                            | R                          | E824R             |
| 825                                      | A/L                                          | V                          | A/L825V           |
| 827                                      | N/R                                          | H                          | N/R827H           |
| 848                                      | L                                            | F                          | L848F             |
| 850                                      | N/H                                          | D                          | N/H850D           |
| 853                                      | E                                            | G                          | E853G             |
| 878                                      | S/G                                          | D                          | S/G878D           |
| 915                                      | N/Y                                          | F                          | N/Y915F           |
| 918                                      | H                                            | D                          | H918D             |
| 921                                      | Q                                            | R                          | Q921R             |
| 926                                      | G                                            | D                          | G926D             |
| 928                                      | T                                            | A                          | T928A             |

<sup>a</sup> Position is based on protein of *SrTm5* because there are three amino acids insertion or deletion in the six reported resistant haplotypes of *Sr22*;

<sup>b</sup> The six reported resistant haplotypes of *Sr22* could have different amino acids at the same position.
